# Supplementary material
Source: PubMed Central journal article supplement (PMC6329375)
Supplement: NIHMS965963-supplement-2.pdf [file NIHMS965963-supplement-2.pdf]

**Supplementary Table 1. Infarct Locations**

| <b>Animal #</b> | <b>Infarct location</b>                |
|-----------------|----------------------------------------|
| <b>Control</b>  |                                        |
| P14             | Anterior wall + half septum            |
| P15             | Mostly septum                          |
| P18             | Anterior wall, posterior wall + septum |
| P20             | Anterior wall, posterior wall + septum |
| <b>hESC-CM</b>  |                                        |
| P22             | Anterior wall + half septum            |
| P23             | Anterior wall + half septum            |
| P24             | Anterior wall, posterior wall + septum |
| P25             | Anterior wall + half septum            |
| P39             | Anterior wall + half septum            |

**Supplementary Table 2. Antibodies used for Immunostaining**

| Antigen             | Antibody type     | Company          | Catalog #  | Lot #                      | Dilution |
|---------------------|-------------------|------------------|------------|----------------------------|----------|
| <b>cTnI</b>         | Rabbit monoclonal | Abcam            | Ab52862    | GR116627-7 and GR116627-10 | 1:200    |
| <b>ssTnI</b>        | Mouse monoclonal  | Novus            | NBP2-46170 | F001                       | 1:200    |
| <b>cTnT</b>         | Mouse monoclonal  | Invitrogen       | MA5-12960  | SH2439467A                 | 1:100    |
| <b>Collagen 1</b>   | Goat polyclonal   | Abcam            | Ab24821    | GR3175980-1                | 1:200    |
| <b>MLC2a</b>        | Mouse monoclonal  | Becton-Dickinson | 565496     | 5082617                    | 1:500    |
| <b>MLC2v</b>        | Rabbit polyclonal | Proteintech      | 10906-1-AP | 39557                      | 1:100    |
| <b>Cav 3</b>        | Rabbit polyclonal | Abcam            | Ab2912     | GR2939265                  | 1:200    |
| <b>Pan-cadherin</b> | Rabbit polyclonal | Sigma            | C3678      | 030M4772                   | 1:100    |
| <b>Connexin 43</b>  | Rabbit polyclonal | Sigma            | C6219      | 045M4882V                  | 1:200    |
| <b>Desmin</b>       | Goat polyclonal   | Santa Cruz       | Sc-7559    | G1014                      | 1:50     |
| <b>CD31</b>         | Mouse monoclonal  | Abcam            | Ab9498     | GR3192748-2                | 1:20     |
| <b>PCM-1</b>        | Rabbit polyclonal | Sigma            | HPA023370  | GR304183-6                 | 1:100    |
| <b>Ki67</b>         | Mouse monoclonal  | BD Bioscience    | BDB558615  | 7242989                    | 1:20     |

**Supplementary Table 3. Arrhythmia Inducibility Scoring (JAMA. 1990;264:2236-2240)**

| Score | Type of stimulation                                                              |
|-------|----------------------------------------------------------------------------------|
| 0     | No inducible ventricular tachyarrhythmia                                         |
| 1     | Under isoprotenerol infusion, 3 extrastimuli required to induce an arrhythmia.   |
| 2     | Under isoprotenerol infusion, 2 extrastimuli required to induce an arrhythmia.   |
| 3     | Under isoprotenerol infusion, 1 extrastimuli required to induce an arrhythmia.   |
| 4     | Without isoprotenerol infusion, 3 extrastimuli required to induce an arrhythmia. |
| 5     | Without isoprotenerol infusion, 2 extrastimuli required to induce an arrhythmia. |
| 6     | Without isoprotenerol infusion, 1 extrastimuli required to induce an arrhythmia. |
| 7     | Tachyarrhythmias induced during the entrainment period                           |

**Supplementary Table 4. Arrhythmia Severity Scoring (JAMA. 1990;264:2236-2240)**

| Score | Arrhythmia induced                                                      |
|-------|-------------------------------------------------------------------------|
| 0     | No induced arrhythmia                                                   |
| 1     | 1~3 repetitive ventricular response (RVR)                               |
| 2     | 4 beats to less than 30 seconds of nonsustained ventricular arrhythmias |
| 3     | Sustained AIVR at rate 120 to 180                                       |
| 4     | Sustained VT at rate 181 to 300                                         |
| 5     | Sustained VT at rate > 300                                              |
